# Supplementary material for: Strategies for improving the communication of satellite-derived InSAR data for geohazards through the analysis of Twitter and online data portals
Source: Copernicus journal article supplement (doi:10.5194/gc-6-75-2023), 2023-06-05
Supplement: Supplementary file 1 [file gc-6-75-2023-supplement.pdf]

Supplement of Geosci. Commun., 6, 75–96, 2023  
<https://doi.org/10.5194/gc-6-75-2023-supplement>  
© Author(s) 2023. CC BY 4.0 License.

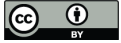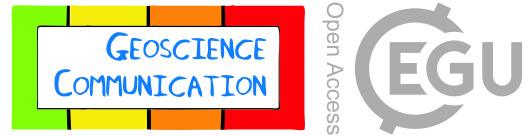

*Supplement of*

## **Strategies for improving the communication of satellite-derived InSAR data for geohazards through the analysis of Twitter and online data portals**

**C. Scott Watson et al.**

*Correspondence to:* C. Scott Watson ([c.s.watson@leeds.ac.uk](mailto:c.s.watson@leeds.ac.uk))

The copyright of individual parts of the supplement might differ from the article licence.

## Twitter text cleaning

### Remove words:

```
("utc","km","pm","na","ffef","cm","ms","ki","fe","una","si","fa","b","est","por","les","hai","ka","th","e","le","m","ff","c",  
,"ne","dr","cc","ya","ko","es","para","con","di","da","del","se","bfef","fdfef","antiwhale","fb","ada","f","de","la","eea",  
,"eebeecfcfc","abbasi","sidna","en","el","ul","islam","allah","de","en","la","d","a","muhajir","ur","bread")
```

### Remove users containing:

```
Autism|autism|Autistic|autistic|Autistics|autistics|sk_insar|hamza_insar|lithifer|myjournals
```

### Scientist classification:

```
scientist <- c("\\blectur+|\\bprof\\b|\\bprofessor\\b|\\bprofesseur|\\bprofesor|\\bresearch  
chair\\b|\\bcrccrc\\b|\\bdean\\b|\\bfaculty\\b|\\bdistinguished chair\\b")
```

```
science_students1 <-
```

```
c("\\bbsc?\\b|\\bmsc?\\b|phd|\\bdphil\\b|\\bdoctoral\\b|\\bmasters\\bgrad+|ologist|ology\\b|oceanography\\b|bio  
me|systems|\\bma\\b|\\bba\\b|science|evolution|istry\\b|ics\\b|\\bmres\\b')
```

```
science_students2 <- c("\\bpost?doc|fellow|\\bpost doc\\b|\\bgradschool\\b|\\bstudying\\b|\\bgraduate school\\b')
```

```
science_organisations1 <-
```

```
c("\\bresearch\\b|\\bscieni|stry\\b|isherics\\b|olog|\\bstud+|environment|\\bconservation|ogical',  
\\bassociation\\b|\\bsynthesis|\\binterdisciplinary\\b|\\bnetwork\\b|\\bdept\\b|\\bdepartment\\b|\\bblab|\\ballian  
ce\\b|\\bcentre|\\bcenter|\\binitiative\\b|\\bacademicians\\b|\\brepository\\b|\\bforum\\b|\\bsection\\b|\\bmeeti  
ng\\b|\\bsociety\\b|\\bchapter\\b|\\bcouncil\\b|university|\\binstitute\\b|\\bcongress\\b|\\bbirdlife|audobon')
```

```
science_organisations2 <-
```

```
c("\\bresearch\\b|\\bscieni|stry\\b|isherics\\b|olog|\\bstud+|environment|\\bconservation|ogical',  
\\bobservator|\\bsymposi*|\\bpeer ?review\\b|\\bjournal\\b|\\bresearch group\\b|\\bfield station|\\bmeetings\\b')
```

```
other_scientists <- c("\\btechnician\\b|\\bacademic\\b|\\bdr\\b|research ass+|\\bresearch scientist\\b|\\bblab  
manager\\b|\\bresearcher\\b|\\boceanographer\\b|chemist\\b|ologist\\b|icist\\b|tician\\b|scientist\\b|\\bbotanist\\  
\\b|\\bscholar\\b|\\botanist\\b|physicist\\b|\\bnaturalist\\b')
```

## LiCSAR user feedback questions

### LiCSAR portal user feedback

We are interested to hear how you use COMET LiCSAR data and if you have any suggestions to improve the service. The survey will take approximately 2 minutes to complete and your feedback is greatly appreciated.

The results derived from this survey may be published to report on the usage of LiCSAR data and improve the service, but individual responses will remain anonymous. For further information, please email [comet@leeds.ac.uk](mailto:comet@leeds.ac.uk) with the subject 'LiCSAR survey'.

Instructions: Please answer NA for not applicable.

[Sign in to Google](#) to save your progress. [Learn more](#)

---

**What is your position?**

- Academic (undergraduate student)
- Academic (postgraduate student)
- Academic (early career researcher)
- Academic (researcher)
- Public Sector
- Private Sector
- Geological/Geophysics Survey
- Volcanic Observatory
- Environmental Consultancy
- Satellite Services Provider
- Development Agency/Charity

---

**Are you a member of COMET?** (<https://comet.nerc.ac.uk/>)

Yes  
 No

---

**Email address (optional).** You will only be contacted in relation to this survey (e.g. to follow up an issue you have identified).

Your answer: \_\_\_\_\_

---

**What is your country of employment?**

Your answer: \_\_\_\_\_

---

**Please list the countries you have studied using LiCSAR data?**

Your answer: \_\_\_\_\_

---

COMET LiCSAR portal <https://comet.nerc.ac.uk/comet-lics-portal/>

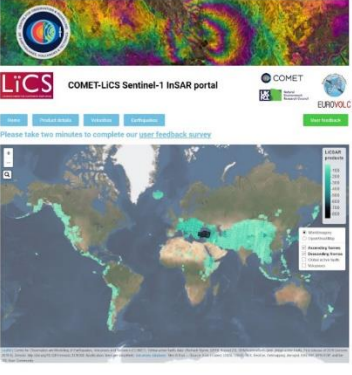


---

**Which LiCSAR products do you use?**

- Coherence
- Wrapped interferograms
- Unwrapped interferograms
- Quick look PNG images
- Look angles
- Amplitudes
- Digital elevation models

---

**How do you use LiCSAR products?** Please provide links to outputs (blogs, web pages, publications) if applicable.

Your answer: \_\_\_\_\_

---

**Approximately how many interferograms (date pairs) [e.g. date1\_date2] of data have you used?**

- 0-10
- 11-50
- 51-100
- 101-200
- 201-400
- Other: \_\_\_\_\_

---

**Approximately how many unique frames of data have you used?** (<https://comet.nerc.ac.uk/comet-lics-portal/>)

- 1
- 2-4
- 5-10
- 11-20
- 21-100
- 101-250
- Other: \_\_\_\_\_

---

**What additional products would be useful to your work?**

- Mean velocities
- Displacement time series
- Integration of LiCSAR products with other data (e.g. optical imagery, land cover, DEMs)
- Strain rate
- Subsidence/uplift rate
- Uncertainties
- Other: \_\_\_\_\_

---

**Describe any problems you have had with LiCSAR products. Please include relevant frame IDs if applicable** (<https://comet.nerc.ac.uk/comet-lics-portal/>)

Your answer: \_\_\_\_\_

---

**Any other comments**

Your answer: \_\_\_\_\_

---

**Submit** [Clear form](#)

Never submit passwords through Google Forms. [Google Forms](#) This content is neither created nor endorsed by Google.

---

**Rate the ease of access to data using the LiCSAR portal**

1 2 3 4 5  
Difficult      Easy

---

**What would make accessing or interpreting LiCSAR data through the portal easier?**

Your answer: \_\_\_\_\_

---

**Would access to LiCSAR products through a cloud based platform like Google Earth Engine benefit your work?**

1 2 3 4 5  
No benefit      Strong benefit

**Figure S1. Screenshot of the LiCSAR user feedback survey. LiCSAR Portal map copyright statement: “Leaflet | Centre for Observation and Modelling of Earthquakes, Volcanoes and Tectonics (COMET), Tiles © Esri — Source: Esri, i-cubed, USDA, USGS, AEX, GeoEye, Getmapping, Aerogrid, IGN, IGP, UPR-EGP, and the GIS User Community”**

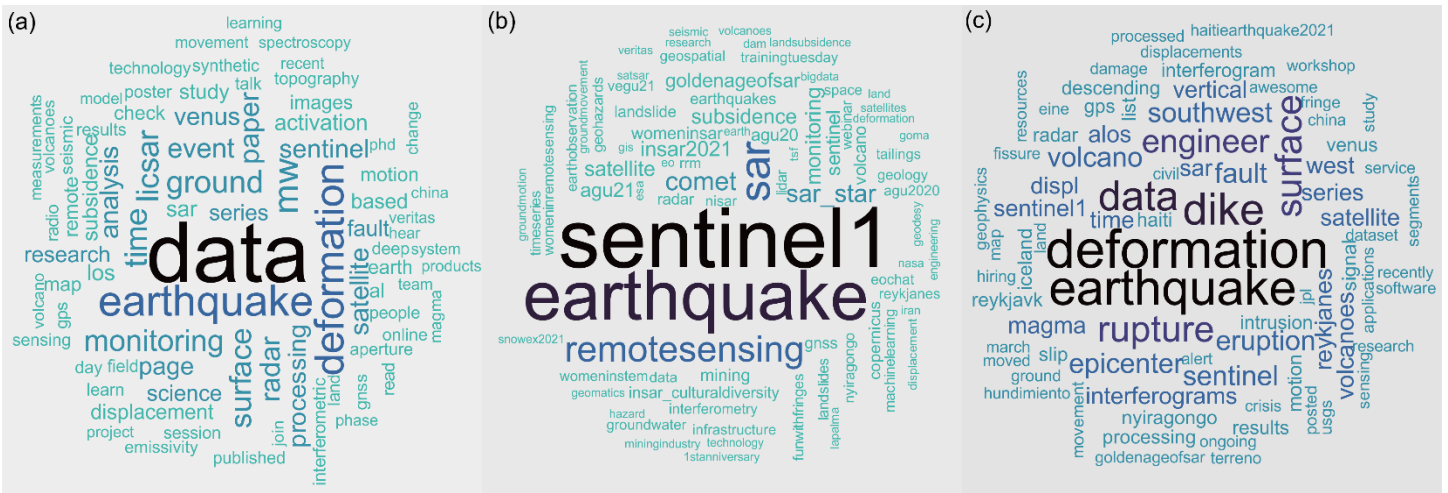

Figure S2. (a) Word cloud showing the top 80 words occurring in the text of InSAR tweets. (b) Word cloud showing the top 80 hashtags occurring in the InSAR tweets. (c) Word cloud showing the combined top 80 words and hashtags occurring in the 50 most retweeted InSAR tweets.

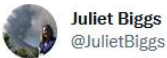

Juliet Biggs  
@JulietBiggs

Weather models show @Agung InSAR fringes are atmospheric NOT deformation. Thanks @falbino @GACOS\_Newcastle @USGSVolcanoes @NERC\_COMET.

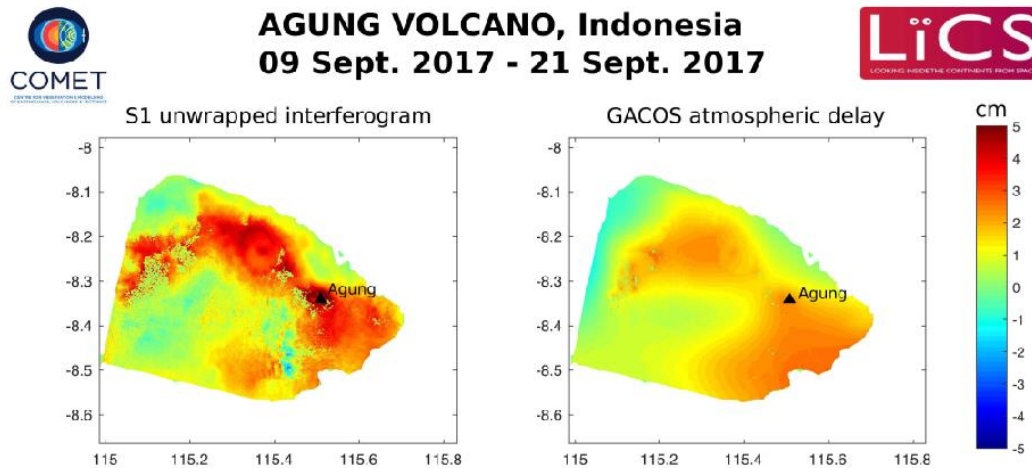

Figure S3. Example Tweet showing the association between apparent InSAR-observed deformation at Agung Volcano and the GACOS atmospheric delay model. The comparison shows that apparent deformation was related to atmospheric signals and not volcanic deformation. Juliet Biggs [Twitter] (2017).

Table S1. InSAR tweet word counts.

| Text of all tweets |       | Hashtags of all tweets |       | Text and hashtags in the top 50 retweeted tweets |       |
|--------------------|-------|------------------------|-------|--------------------------------------------------|-------|
| Word               | Count | Word                   | Count | Word                                             | Count |

|                 |     |                         |     |                |    |
|-----------------|-----|-------------------------|-----|----------------|----|
| data            | 676 | sentinel1               | 323 | deformation    | 11 |
| earthquake      | 312 | earthquake              | 259 | earthquake     | 10 |
| deformation     | 269 | sar                     | 143 | dike           | 9  |
| mw              | 222 | remotesensing           | 116 | data           | 8  |
| ground          | 200 | comet                   | 67  | rupture        | 7  |
| time            | 199 | sar_star                | 63  | surface        | 7  |
| licsar          | 190 | monitoring              | 48  | engineer       | 6  |
| monitoring      | 183 | subsidence              | 48  | epicenter      | 5  |
| surface         | 170 | insar2021               | 46  | eruption       | 5  |
| radar           | 167 | satellite               | 44  | fault          | 5  |
| paper           | 165 | goldenageofsar          | 40  | sentinel       | 5  |
| event           | 163 | sentinel                | 40  | southwest      | 5  |
| sentinel        | 142 | agu21                   | 37  | volcano        | 5  |
| satellite       | 140 | agu20                   | 33  | alos           | 4  |
| analysis        | 138 | volcano                 | 31  | displ          | 4  |
| venus           | 136 | womeninsar              | 29  | interferograms | 4  |
| processing      | 124 | mining                  | 27  | magma          | 4  |
| page            | 121 | earthquakes             | 24  | reykjanes      | 4  |
| research        | 117 | insar_culturaldiversity | 23  | sar            | 4  |
| series          | 115 | radar                   | 23  | satellite      | 4  |
| science         | 114 | gnss                    | 22  | sentinel1      | 4  |
| fault           | 113 | copernicus              | 21  | series         | 4  |
| activation      | 112 | landslide               | 20  | time           | 4  |
| los             | 108 | landslides              | 19  | vertical       | 4  |
| sar             | 105 | womeninremotesensing    | 19  | volcanoes      | 4  |
| subsidence      | 100 | nyiragongo              | 18  | west           | 4  |
| based           | 99  | womeninstem             | 18  | descending     | 3  |
| study           | 98  | eochat                  | 17  | gps            | 3  |
| displacement    | 90  | geohazards              | 17  | haiti          | 3  |
| earth           | 85  | earthobservation        | 16  | iceland        | 3  |
| check           | 83  | lidar                   | 16  | interferogram  | 3  |
| al              | 79  | machinelearning         | 16  | intrusion      | 3  |
| map             | 78  | interferometry          | 15  | list           | 3  |
| motion          | 78  | trainingtuesday         | 15  | motion         | 3  |
| images          | 75  | agu2020                 | 14  | nyiragongo     | 3  |
| remote          | 74  | funwithfringes          | 14  | processing     | 3  |
| topography      | 72  | geology                 | 14  | radar          | 3  |
| gps             | 70  | geospatial              | 14  | results        | 3  |
| deep            | 69  | nisar                   | 14  | reykjavk       | 3  |
| interferometric | 69  | timeseries              | 14  | signal         | 3  |
| synthetic       | 69  | vegu21                  | 14  | slip           | 3  |
| talk            | 69  | groundwater             | 13  | venus          | 3  |
| poster          | 68  | infrastructure          | 13  | academic       | 2  |
| field           | 66  | reykjanes               | 13  | alert          | 2  |
| day             | 65  | tailings                | 13  | applications   | 2  |

|              |    |                |    |                     |   |
|--------------|----|----------------|----|---------------------|---|
| results      | 65 | webinar        | 13 | apply               | 2 |
| session      | 65 | data           | 12 | ascending           | 2 |
| technology   | 64 | rrm            | 12 | awesome             | 2 |
| aperture     | 63 | space          | 12 | based               | 2 |
| learn        | 63 | engineering    | 11 | china               | 2 |
| land         | 62 | esa            | 11 | civil               | 2 |
| people       | 62 | nasa           | 11 | coseismic           | 2 |
| emissivity   | 61 | satsar         | 11 | crater              | 2 |
| radio        | 61 | bigdata        | 10 | crisis              | 2 |
| gnss         | 60 | deformation    | 10 | current             | 2 |
| online       | 60 | displacement   | 10 | damage              | 2 |
| seismic      | 60 | geodesy        | 10 | dataset             | 2 |
| sensing      | 59 | geomatics      | 10 | deep                | 2 |
| published    | 58 | gis            | 10 | deformacin          | 2 |
| read         | 57 | goma           | 10 | desc                | 2 |
| team         | 55 | groundmotion   | 10 | direction           | 2 |
| volcano      | 55 | hazard         | 10 | displacements       | 2 |
| hear         | 54 | landsubsidence | 10 | east                | 2 |
| magma        | 54 | satellites     | 10 | eastern             | 2 |
| phd          | 54 | tsf            | 10 | eine                | 2 |
| recent       | 54 | volcanoes      | 10 | fissure             | 2 |
| products     | 53 | dam            | 9  | fringe              | 2 |
| phase        | 52 | earth          | 9  | geodesy             | 2 |
| model        | 51 | land           | 9  | geophysics          | 2 |
| spectroscopy | 51 | lapalma        | 9  | goldenageofsar      | 2 |
| veritas      | 50 | miningindustry | 9  | ground              | 2 |
| volcanoes    | 50 | research       | 9  | haitiearthquake2021 | 2 |
| china        | 49 | technology     | 9  | hiring              | 2 |
| join         | 49 | veritas        | 9  | hundimiento         | 2 |
| measurements | 49 | 1stanniversary | 8  | info                | 2 |
| movement     | 49 | eo             | 8  | join                | 2 |
| project      | 49 | geohazard      | 8  | jpl                 | 2 |
| applications | 48 | geophysics     | 8  | land                | 2 |
| change       | 48 | geotechnical   | 8  | lateral             | 2 |
| learning     | 48 | gps            | 8  | location            | 2 |

**Table S2. Paired words from Twitter followers profile descriptions classified as scientists (n = 11,902). Followers were included if they followed one of the top 10 InSAR tweeters, or the top 10 retweeted InSAR tweeters.**

| Paired words        | Occurrences |
|---------------------|-------------|
| remote sensing      | 905         |
| phd student         | 598         |
| phd candidate       | 273         |
| assistant professor | 202         |

|               |               |     |
|---------------|---------------|-----|
| earth         | science       | 193 |
| earth         | observation   | 192 |
| climate       | change        | 185 |
| earth         | sciences      | 170 |
| data          | science       | 136 |
| associate     | professor     | 121 |
| machine       | learning      | 113 |
| data          | scientist     | 109 |
| research      | scientist     | 99  |
| natural       | hazards       | 80  |
| structural    | geology       | 80  |
| research      | fellow        | 78  |
| student       | university    | 77  |
| postdoctoral  | researcher    | 72  |
| earth         | scientist     | 63  |
| sensing       | gis           | 62  |
| active        | tectonics     | 60  |
| environmental | science       | 60  |
| ph            | student       | 59  |
| graduate      | student       | 57  |
| research      | associate     | 57  |
| student       | studying      | 57  |
| science       | technology    | 56  |
| phd           | researcher    | 55  |
| gis           | remote        | 54  |
| grad          | student       | 52  |
| opinions      | mine          | 51  |
| sensing       | scientist     | 51  |
| geospatial    | data          | 50  |
| msc           | student       | 48  |
| ph            | candidate     | 48  |
| views         | mine          | 48  |
| research      | assistant     | 45  |
| climate       | scientist     | 44  |
| earth         | planetary     | 44  |
| earthquake    | geologist     | 44  |
| earthquake    | geology       | 44  |
| husband       | father        | 42  |
| structural    | geologist     | 41  |
| water         | resources     | 41  |
| geological    | survey        | 40  |
| planetary     | scientist     | 39  |
| deep          | learning      | 38  |
| earth         | space         | 38  |
| earth         | environmental | 37  |
| assistant     | prof          | 36  |
| asst          | prof          | 36  |
| department    | earth         | 36  |

|               |              |    |
|---------------|--------------|----|
| planetary     | science      | 36 |
| satellite     | data         | 36 |
| science       | news         | 34 |
| science       | writer       | 34 |
| sea           | level        | 33 |
| disaster      | risk         | 32 |
| planetary     | sciences     | 32 |
| spatial       | data         | 32 |
| senior        | lecturer     | 31 |
| university    | leeds        | 31 |
| assoc         | prof         | 30 |
| earthquake    | engineering  | 30 |
| master        | student      | 30 |
| research      | scholar      | 30 |
| science       | communicator | 30 |
| space         | science      | 30 |
| earth         | system       | 29 |
| software      | engineer     | 29 |
| environmental | sciences     | 28 |
| nature        | lover        | 28 |
| postdoctoral  | fellow       | 28 |
| professor     | earth        | 28 |
| associate     | prof         | 27 |
| born          | ppm          | 27 |
| climate       | science      | 27 |
| geographic    | information  | 27 |
| geophysics    | phd          | 27 |
| natural       | resources    | 27 |

**Table S3. Paired words from Twitter followers profile descriptions classified as non-scientists (n = 19,778). Followers were included if they followed one of the top 10 InSAR tweeters, or the top 10 retweeted InSAR tweeters.**

| Paired words |             | Occurrences |
|--------------|-------------|-------------|
| remote       | sensing     | 233         |
| earth        | observation | 107         |
| climate      | change      | 51          |
| gis          | remote      | 50          |
| estudiante   | ingeniera   | 39          |
| machine      | learning    | 38          |
| husband      | father      | 36          |
| los          | angeles     | 33          |
| sensing      | gis         | 32          |
| official     | twitter     | 31          |
| twitter      | account     | 30          |
| software     | engineer    | 27          |
| opinions     | mine        | 26          |



|            |             |    |
|------------|-------------|----|
| real       | estate      | 26 |
| views      | expressed   | 26 |
| gis        | analyst     | 25 |
| ingeniera  | geofisica   | 25 |
| lives      | matter      | 23 |
| data       | analyst     | 22 |
| ingeniera  | geologica   | 22 |
| social     | media       | 22 |
| animal     | lover       | 21 |
| ciencias   | tierra      | 21 |
| civil      | engineer    | 21 |
| geospatial | data        | 21 |
| oil        | gas         | 21 |
| black      | lives       | 20 |
| love       | life        | 20 |
| gis        | specialist  | 18 |
| human      | rights      | 18 |
| ingeniera  | unam        | 18 |
| puerto     | rico        | 18 |
| social     | justice     | 18 |
| project    | manager     | 17 |
| wife       | mom         | 17 |
| cancer     | survivor    | 16 |
| facultad   | ingeniera   | 16 |
| food       | security    | 16 |
| love       | family      | 16 |
| music      | lover       | 16 |
| ph         | candidate   | 16 |
| satellite  | imagery     | 16 |
| avid       | reader      | 15 |
| deep       | learning    | 15 |
| founder    | ceo         | 15 |
| natural    | hazards     | 15 |
| nature     | lover       | 15 |
| web        | developer   | 15 |
| aperture   | radar       | 14 |
| business   | development | 14 |
| father     | husband     | 14 |
| geologica  | unam        | 14 |
| ingeniero  | civil       | 14 |
| land       | surveyor    | 14 |
| personal   | account     | 14 |
| proud      | father      | 14 |
| synthetic  | aperture    | 14 |
| business   | owner       | 13 |
| husband    | dad         | 13 |
| tweets     | mine        | 13 |
| wife       | mother      | 13 |

|            |              |    |
|------------|--------------|----|
| amante     | los          | 12 |
| amateur    | photographer | 12 |
| cuenta     | oficial      | 12 |
| dad        | husband      | 12 |
| disaster   | risk         | 12 |
| dog        | lover        | 12 |
| estudiante | ing          | 12 |
| geospatial | analyst      | 12 |
| hugamaur   | um           | 12 |
| ingeniero  | gelogo       | 12 |
| mom        | wife         | 12 |
| mother     | grandmother  | 12 |
| software   | developer    | 12 |
| southern   | california   | 12 |
| views      | mine         | 12 |
| water      | resources    | 12 |
| born       | raised       | 11 |
| content    | creator      | 11 |
| earth      | surface      | 11 |

**Table S4: Barriers to uptake of satellite data identified by volcano observatories. Information is summarised from the responses from a range of official development assistance countries to a 2017 survey described below.**

We sent a short questionnaire (in English) to volcano observatories in developing countries and overseas territories, designed to understand their current operational use of remote sensing, the issues they face, and what could be beneficial to them. Ten responses were received to the questionnaires, from Guatemala (x 2), Costa Rica (x 2), Ethiopia (x 2), Democratic Republic of Congo, Trinidad and Tobago (SRC, with responsibility for the English-speaking Caribbean), Montserrat and Indonesia.

| Issue                | Explanation                                                                                                                                                                                                                         | Solutions                                                    |
|----------------------|-------------------------------------------------------------------------------------------------------------------------------------------------------------------------------------------------------------------------------------|--------------------------------------------------------------|
| Awareness            | Some observatories are not fully aware of the types of remote sensing available or where to access the data.                                                                                                                        | Collaboration.<br>Capacity building.                         |
| Reliability          | The internet and particularly social media means the world is more connected than ever before. Data are frequently posted online, especially during eruption crises, but observatories must ensure they are from a reliable source. | Ready-processed and analysed data.<br>External verification. |
| Timeliness           | In rapidly-developing unrest or eruption situations, timely access to data is crucial. Some data cannot be accessed in real-time or near real-time. The download and processing time of other data renders this inappropriate.      | Ready-processed and analysed data.                           |
| Background knowledge | To understand the unrest at a volcano some knowledge of background activity is required.                                                                                                                                            | Ready-processed and analysed data.                           |
| Ground truth         | Ground-truthing can be required to verify what is seen through remote-sensing. This requires on-the-ground expertise, human and economic resources.                                                                                 | Collaboration.                                               |
| Data cost            | Some remotely-sensed data and software for analysis is prohibitively expensive                                                                                                                                                      | Collaboration.<br>Data sharing.                              |

|                           |                                                                                                                                                                                          |                                                  |
|---------------------------|------------------------------------------------------------------------------------------------------------------------------------------------------------------------------------------|--------------------------------------------------|
| Human resources           | Training in specialist areas such as satellite data retrieval is costly. There may be no redundancy within a country, with one expert and no back-up.                                    | Capacity building.                               |
| Computing resources       | Processing data can require significant computing resources, including (often costly) specialist software, fast computers with powerful processors, large amounts of data storage space. | Ready-processed and analysed data.               |
| Power supply and internet | Power can be unreliable in many countries, and particularly at remote observatories. Internet access and speed may be insufficient to download large data files.                         | Ready-processed and analysed data & small files. |

### References:

Juliet Biggs [@JulietBiggs]: “Weather models show @Agung InSAR fringes are atmospheric NOT deformation. Thanks @falbino @GACOS\_Newcastle @USGSVolcanoes @NERC\_COMET.”, Twitter, available at: <https://twitter.com/JulietBiggs/status/912740738710016000> (last access: 13 December 2022), posted: 07:08PM, 26 September 2017.
